# Supplementary material for: Secular Trends in Diabetes-Related Preventable Hospitalizations in the United States, 1998–2006
Source: Oxford University Press journal article supplement (doi:10.2337/dc08-2211), 2009-04-14
Supplement: dc08-2211_online_appendix.doc [file dc08-2211_online_appendix.doc]

**Table A1. ICD-9-CM code definitions for diabetes related preventable hospitalizations**

| Diabetes related conditions | ICD-9-CM |
| --- | --- |
| **Short-term complications** |  |
| Ketoacidosis | 250.1x |
| Hyperosmolarity | 250.2x |
| Other coma | 250.3x |
|  |  |
| **Uncontrolled diabetes** |  |
| Diabetes without mention of complications, type II or unspecified type, uncontrolled | 250.02 |
| Diabetes without mention of complications, type I, uncontrolled | 250.03 |
|  |  |
| **Long-term complications** |  |
| Renal manifestations | 250.4x |
| Ophthalmic manifestations | 250.5x |
| Neurological manifestations | 250.6x |
| Peripheral circulatory disorders | 250.7x |
| Other specified manifestations | 250.8x |
| Unspecified complication | 250.9x |
|  |  |
| **Lower-extremity amputations (LEAs)** | 84.1x in any procedure positions and  250.xx in any diagnosis positions;  excluded if any diagnosis is 895.x-897.x |

Note: All the conditions except for LEAs were based on primary diagnosis code.
